1 **Title:** Interleukin-33 stimulates stress in the endoplasmic reticulum of the human  
2 myometrium via an influx of calcium during initiation of labor

3 Li Chen<sup>1\*</sup>, Zhenzhen Song<sup>1\*</sup>, Xiaowan Cao<sup>2\*</sup>, Mingsong Fan<sup>1</sup>, Yan Zhou<sup>1</sup>, Guoying  
4 Zhang<sup>1#</sup>

5 <sup>1</sup>Department of Obstetrics, The First Affiliated Hospital of Nanjing Medical  
6 University, Nanjing 210036, China

7 <sup>2</sup>Department of Obstetrics, The Affiliated Wuxi Maternity and Child Health Care  
8 Hospital of Nanjing Medical University, Wuxi 214002, China

9 **Short title:** IL-33 stimulates stress via an influx of calcium

10 \*Li Chen, Zhenzhen Song and Xiaowan Cao contributed equally to this article.

11 #Correspondence to: Guoying Zhang

12 Department of Obstetrics

13 The First Affiliated Hospital of Nanjing Medical University

14 Jiangdong North Road 368

15 Nanjing, China 210036

16 Telephone: +86-025-68308882

17 Email address: zhangguoying@jsph.org.cn

18 **Abstract**

19 **Background:** Inflammation is currently recognized as one of the major causes of  
20 premature delivery. As a member of the IL-1 $\beta$  family, interleukin-33 (IL-33) has been  
21 shown to be involved in a variety of pregnancy-related diseases. This study aims to  
22 investigate the potential function of IL-33 in uterine smooth muscle cells during labor.

23 **Methods:** Samples of myometrium from term pregnant ( $\geq 37$  weeks gestation) women  
24 were frozen or cells were isolated and cultured. Immunohistochemistry and western  
25 blotting were used to identify the distribution of IL-33. Cultured cells were incubated  
26 with LPS to mimic inflammation as well as 4 $\mu$ 8C to block endoplasmic reticulum (ER)  
27 stress and BAPTA-AM, a calcium chelator.

28 **Results:** Similar with onset of labor, LPS could reduce the expression of nuclear  
29 IL-33 in a time-limited manner and induced ER stress. Meanwhile, Knockdown of  
30 IL-33 increased LPS-induced calcium concentration, ER stress and phosphorylation  
31 of NF- $\kappa$ B and p38. In addition, siRNA IL-33 further simulates LPS enhanced COX-2  
32 expression via NF- $\kappa$ B and p38 pathways. IL-33 expression was decreased in the  
33 nucleus with the onset of labor. LPS induced ER stress and increased expression of  
34 the labor-associated gene, COX-2, as well as IL-6 and IL-8 in cultured myometrial  
35 cells. IL-33 also increased COX-2 expression. However, after IL-33 was knockdown,  
36 the stimulating effect of LPS on calcium was enhanced. 4 $\mu$ 8C also inhibited the  
37 expression of COX-2 markedly. The expression of calcium channels on the membrane  
38 and intracellular free calcium ion were both increased accompanied by  
39 phosphorylated NF- $\kappa$ B and p38.

40 **Conclusions:** These data suggest that IL-33 may be involved in initiation of labor by

41 leading to stress of the ER via an influx of calcium ions in human uterine smooth

42 muscle cells.

43 **Funding:** This study was supported by grants from the National Natural Science

44 Foundation of China (Nos. 81300507).

45

## 46 **Introduction**

47 Preterm delivery occurs before 37 weeks of gestation and is one of the major  
48 causes of perinatal morbidity and mortality<sup>[1]</sup>. The main difference between preterm  
49 and term labor is when the initiation of labor begins. It is widely accepted that  
50 infection, uterine over-distension, decline in progesterone action, breakdown of  
51 maternal-fetal tolerance, stress and other unknown reasons are involved in preterm  
52 labor<sup>[2]</sup>. However, all of these reasons lead to inflammatory events. These are mainly  
53 due to the identification of microorganisms and their products, and increased secretion  
54 of pro-inflammatory cytokines and chemokines in the decidua and myometrium,  
55 which enable leukocytes to infiltrate the uterus leading to its activation<sup>[3,4]</sup>.

56 As a member of IL-1 family, IL-1 $\beta$  is one of the well-recognized inflammatory  
57 factors that induce the initiation of labor. Interleukin-33 (IL-33) is a member of the  
58 IL-1 $\beta$  family and is expressed in a variety of cells, including innate immune  
59 (macrophage and dendritic), Th2, B, epithelial, endothelial and muscle cells. Also, it  
60 has been shown to have a key role in various diseases, including inflammatory,  
61 autoimmune (including asthma), cardiovascular and allergic diseases<sup>[5,6]</sup>.

62 Recently, Huang et al. found that after exogenous administration of IL-33, it was  
63 able to activate B cell-mediated immune regulation and promote the expression of  
64 progesterone-induced blocking factor 1 (PIBF1), which plays an essential role in  
65 safeguarding against preterm labor<sup>[7]</sup>. Preliminary data showed that IL-33 was mainly  
66 located in the nuclei of myometrial cells, and with the onset of labor, IL-33 expression  
67 in the nucleus decreased. Studies also showed that mast cells responded to the

68 secretion of IL-33 after exposure to the allergens and this affected airway smooth  
69 muscle hyper-responsiveness by promoting the contraction and enhancing calcium  
70 influx of airway smooth muscle, leading asthma attacks<sup>[8, 9]</sup>. In addition, IL-33 was  
71 found to be effective in alleviating the myocardial endoplasmic reticulum (ER) stress  
72 response caused by myocardial injury<sup>[10, 11]</sup>. These studies suggested a potential role  
73 of IL-33 in human parturition and prompted us to investigate the changes in IL-33  
74 expression in the nucleus of the myometrium during the third trimester of pregnancy.

## 75 **Results**

### 76 **Nuclear expression of IL-33 is reduced during labor**

77 In order to establish the nuclear function of IL-33, we first confirmed the presence  
78 of the nuclear protein in human uterine smooth muscle cells. Immunohistochemistry  
79 with the anti-IL-33 antibody revealed that IL-33 was expressed in the nuclei of  
80 myometrial cells. The term labor (TL) and preterm labor (PTL) groups showed weak  
81 staining of IL-33 in the nuclei of myometrium cells. In contrast, strong nuclear  
82 staining of IL-33 was observed in the myometrial cells of term nonlabor (TNL) and  
83 preterm nonlabor (PNL) groups (Figure 1A).

84 In order to identify the localization of IL-33 changes during labor,  
85 immunofluorescence staining was performed on myometrium sections. This also  
86 confirmed the nuclear localization of IL-33 in the myometrium cells. It should be  
87 noted that the expression of nuclear IL-33 was more intense in the TNL and PNL  
88 groups when compared with TL and PTL groups. There were similar levels of staining  
89 in the two no labor groups as well as the two labor groups (Figure 1B). Western

90 blotting analysis revealed that there was no difference in the expression of total IL-33  
91 among all groups. To confirm the nuclear localization of the IL-33, we separated the  
92 cytoplasmic and nuclear fraction of myometrial cells. There was decreased levels of  
93 nuclear IL-33 from the TNL to the TL groups, which was consistent with the change  
94 seen from PNL to PTL. The results of qPCR suggested that mRNA expression of  
95 total IL-33 was not different between the different groups (Figure 1C).

#### 96 **Treatment with LPS resulted in a time-dependent nuclear IL-33 decrease**

97 To examine the function and the mechanisms of nuclear IL-33 during parturition,  
98 myometrial cells were incubated with LPS and the kinetic changes of IL-33 we  
99 visualized by confocal microscopy. Following treatment with LPS, there was a  
100 marked decrease in endonuclear IL-33 levels for approximately 3 hours and then  
101 increased to above control values by 12 hours, which was higher than that in the  
102 control group (Figure 2A). For the following 12h the levels appeared to decrease  
103 again. We next investigated the effect of LPS on the localization of IL-33 in these  
104 cells. Western blots confirmed that the expression levels of total IL-33 were reduced  
105 within 6 hours, then peaked at 12 hours. The cytoplasmic and nuclear fractions of  
106 primary myometrial cells were also isolated at different time points after LPS  
107 treatment. Western blot analysis showed that nuclear IL-33 reduced with the  
108 stimulation by LPS. However, the levels again peaked in the nucleus at 12 hours, and  
109 was higher than seen in control cells (Figure 2B).The above shows that LPS induces a  
110 time-dependent reduction of IL-33 in the nucleus.

#### 111 **Silencing of IL-33 enhances LPS-induced calcium ion levels**

112 To investigate whether the presence of IL-33 regulates uterine smooth muscle  
113 contraction, knockdown experiments targeting IL-33 were performed before LPS  
114 treatment for 6 hours or 12 hours, respectively. After stimulating for 6 hours, the  
115 increase in intracellular calcium levels was observed by using a laser confocal  
116 microscope to observe intracellular fluorescent probes which was consistent with the  
117 calcium channels status (Figure 3A). Apparent enhancement in protein levels of  
118 calcium channels proteins, Cav3.1 and Cav3.2, were demonstrated after siRNA-based  
119 LPS treatment while siRNA-mediated efficient knockdown of IL-33 was  
120 simultaneously observed (Figure 3B).

#### 121 **Inhibition of cytoplasmic calcium attenuates LPS induced ER and COX-2**

122 LPS was able to induce cytoplasmic calcium levels and ER stress in uterine  
123 smooth muscle cells, but whether there is a correlation between the two is unknown.  
124 In this study, BAPTA-AM was used to evaluate the role of elevated cytoplasmic  
125 calcium levels during ER stress. The results showed an attenuation in the expression  
126 of LPS-induced COX-2 after 12 hours of preloading cells with BAPTA-AM (Figure  
127 4A). After LPS stimulation for 6 and 12 hours respectively, the intracellular ER state  
128 was assessed by western blotting analysis. We found that p-IRE1 $\alpha$  and XBP1s in the  
129 myocytes of pre-chelating-based stimulation showed a decreasing trend when  
130 compared with cells stimulated by LPS directly. Furthermore, on the basis of that no  
131 significant difference was detected in LPS treatment when directly compared to  
132 controls, there was no apparent alteration in protein levels of GRP78 in  
133 pre-chelating-based stimulation (Figure 4B).

### 134 **IL-33 affects the LPS-induced ER stress response in myometrium cells**

135 Since studies have indicated a crucial role of ER stress during successful  
136 pregnancies as well as in the pathogenesis of preeclampsia, we decided to assess  
137 whether the ER stress response also played a role in labor. As shown in Figure 5A,  
138 protein expression of the ER stress-sensing molecules, p-IRE1 $\alpha$  and XBP1s, were  
139 significantly increased in the TL and PTL groups when compared with the TNL and  
140 PNL groups. However, there was no significant change in GRP78 protein expression  
141 among the groups.

142 In order to verify whether the transcription levels changed, qPCR results were  
143 compared those of western blotting analysis and were found to be similar (Figures 5A  
144 and 5B). Q-PCR showed that the mRNA expression of GRP78 had no intergroup  
145 difference. However, XBP1s mRNA expression was increased in PTL when compared  
146 with PNL, but there was no difference between the TNL and TL groups. Overall,  
147 these findings support the hypothesis that activation of ER stress is a potential  
148 mechanism underlying labor. In order to confirm this, we stimulated primary  
149 myometrial cells with LPS and induced the ER stress response without altering  
150 GRP78 protein levels. We found that the expression levels of p-IRE1 $\alpha$  and XBP1s  
151 reached their peaks at 1 hour and 30 minutes, then decreased to almost the basal levels  
152 at 6 hours and 12 hours, respectively (Figure 5C). We next suppressed its expression  
153 with IL-33 siRNA in these cells and found that IL-33 knockdown heightened the  
154 LPS-induced ER stress response. This is shown in Figure 5D and in contrast to the  
155 LPS group, XBP1s and phosphorylated IRE1 $\alpha$  protein levels were increased in the



156 IL-33 siRNA group.

157 **IL-33 siRNA and ER stress response regulate COX-2 expression in myometrium**  
158 **cells**

159 In order to study whether IL-33 has a direct impact on expression of COX-2, we  
160 introduced IL-33 siRNA into primary myometrial cells and treated them with LPS for  
161 12 hours. COX-2 was up-regulated of in the IL-33 siRNA group (Figure 6A). The  
162 previous results showed that a milder ER stress response occurred with the onset of  
163 labor and could be modulated by cytoplasmic calcium levels. To define the possible  
164 effect of the ER stress during the labor, the IRE1 inhibitor, 4 $\mu$ 8c, was used to block  
165 the LPS-induced ER stress response. Western blots were conducted to examine  
166 whether the expression of COX-2 could be inhibited. The result demonstrated that  
167 4 $\mu$ 8C inhibited the expression of COX-2 markedly (Figure 6B).

168 **IL-33 affects COX-2 expression via p38/MAPK and NF- $\kappa$ B signaling pathways**

169 We also found the expression of phosphorylation of p38 and NF- $\kappa$ B increased  
170 significantly when LPS caused an induction of COX-2 expression, and these peaked  
171 at 30 minutes (Figure 7A). Based on above observations, we wondered whether IL-33  
172 was involved in these signaling pathways, thereby affecting the expression of COX-2.  
173 Based on the knockdown experiments targeting IL-33 which showed that when  
174 siRNA-based LPS stimulation lasted for 1 hour, the protein levels of NF- $\kappa$ B  
175 phosphorylation were significantly increased compared to that of the group without  
176 IL-33 knockout. However, the phosphorylation of p38 was not significantly different  
177 within 30 minutes of LPS stimulus but elevated sharply when the stimulus lasted for

178 30 minutes (Figure 7B). In addition, p38/MAPK and NF- $\kappa$ B signaling pathway  
179 inhibitors, SB-202190 and JSH-23 respectively, were added before LPS treatment,  
180 and western blotting analysis showed that COX-2 expression was significantly  
181 reduced (Figure 7C).

### 182 **IL-33 siRNA and cytoplasmic calcium influence the expression of IL-8 and IL-6** 183 **secreted by myometrium cells**

184 The expression levels of IL-8 and IL-6 in the supernatants of the LPS treated cells  
185 were increased when compared with the controls. In addition, in comparison with the  
186 LPS group, more IL-8 and IL-6 were released into the cell supernatants after IL-33  
187 siRNA transfection and partial binding of cytoplasmic calcium ions (Figure 8).

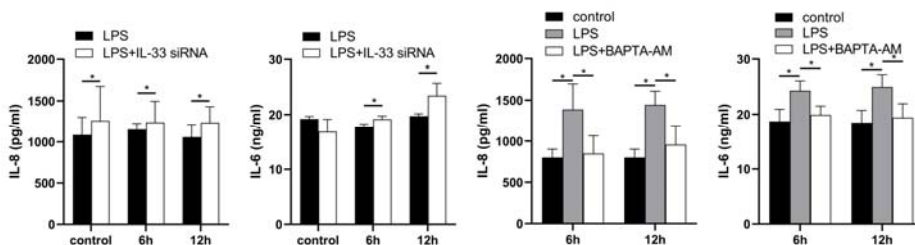

188

### 189 **Discussion**

190 Although the specific mechanism of premature delivery is still unclear,  
191 inflammation is currently recognized as one of the major causes of this  
192 phenomenon<sup>[12, 13]</sup>. The current understanding of this process is that as the  
193 myometrium switches from a quiescent to a contractile state, it also undergoes a shift  
194 in signaling from anti-inflammatory to pro-inflammatory pathways<sup>[14, 15]</sup>. As an  
195 inflammatory factor, IL-33 has many similar effects to IL-1 $\beta$ . IL-33 is composed of a  
196 N-terminal nuclear domain and a C-terminal IL-1-like cytokine domain which is  
197 mainly localized in the nucleus and binds to histones and chromatin<sup>[16]</sup>. It proposed

198 that IL-33 plays a dual role, playing a pro-inflammatory role as an inflammatory  
199 cytokine outside the cell and participating in the regulation of transcription as a  
200 nuclear factor<sup>[17]</sup>.

201 Numerous studies have shown that IL-33 had an essential role in  
202 pregnancy-related diseases such as recurrent abortion and preeclampsia<sup>[18, 19]</sup>. In early  
203 pregnancy, IL-33 can increase the proliferation and invasion of the decidua, and  
204 decidual macrophage-derived IL-33 is a key factor for placental growth, and its  
205 deletion can lead to adverse pregnancy outcomes<sup>[20, 21]</sup>. Similarly, IL-33 expression is  
206 reduced in the placenta of preeclampsia patients, which affects placental function by  
207 reducing the proliferation, migration and invasion of trophoblast cells<sup>[22, 23]</sup>. In  
208 preliminary experiments, we found that IL-33 was expressed in the nuclei of  
209 myometrium cells in the third trimester of pregnancy and the levels decrease  
210 following the onset of the labor. This was consistent with a previous study which  
211 showed that IL-33, a mucosal alarmin, was being sequestered in the nucleus in order  
212 to limit its pro-inflammatory potential. It was released as a warning signal when tissue  
213 was damaged following stress or infection such as its release from the nucleus during  
214 asthma attack<sup>[9, 24]</sup>.

215 In order to identify factors that are important in driving PTL progression, we  
216 utilized LPS to stimulate primary cultures of uterine smooth muscle cells to mimic  
217 inflammation during labor. This resulted in a rapid decrease of IL-33 in the nucleus  
218 after LPS treatment which was ameliorated after the stimulus duration was lengthened.  
219 It is well known that labor is a physiological process and will not cause a maternal

220 pathological state, so we hypothesized that the recruitment of IL-33 may be to  
221 maintain cell homeostasis and enable its normal function. In order to explore the  
222 potential effect of nuclear IL-33 during labor, we knocked down IL-33 in primary  
223 myometrial cells before LPS stimulation. Initially, we found that after introduction of  
224 siRNA IL-33, the intracellular calcium ion levels and the expression of T-type calcium  
225 channel proteins (Cav3.1 and Cav3.2) on the membrane increased sharply. This was  
226 consistent with other studies which showed that IL-33 can affect calcium elevation  
227 autonomously or it can cooperate with other mediators to achieve this effect, although  
228 the specific mechanism is still unclear<sup>[25]</sup>.

229 Myometrial contractions are mainly regulated by intracellular  $Ca^{2+}$  levels and  
230 calmodulin and the effect of IL-33 on calcium elevation is likely to be a direct effect  
231 upon myometrial tissues<sup>[26]</sup>. However, we found that reduced IL-33 in the nucleus  
232 promoted the release of pro-inflammatory cytokines such as IL-8 and IL-6 in  
233 myometrial cells, while the expression of pro-inflammatory cytokines was reduced  
234 after  $Ca^{2+}$  binding in the cytoplasm. This led us to conclude that IL-33 does play a  
235 certain role in the process of parturition. Intracellular calcium was closely linked to  
236 the ER stress response. It is well documented that when tissues and cells are  
237 irretrievably stimulated or damaged, the ER stress response occurs to maintain cell  
238 homeostasis. The ER which is the main intracellular calcium storage chamber, plays a  
239 vital impact on maintaining  $Ca^{2+}$  homeostasis in various organelles, and homeostasis  
240 of the ER is closely related to intracellular  $Ca^{2+}$  concentration<sup>[27]</sup>.

241 Researchers recently found that LPS stimulation of uterine explants could cause

242 an ER stress response in uterine muscle. This led them to hypothesized that  
243 dysregulation of ER homeostasis in uterine smooth muscle might be one of the  
244 mechanisms of LPS induced inflammatory preterm delivery<sup>[28]</sup>. When compared with  
245 non-laboring specimens, the levels of GRP78, IRE1 and XBP1s in fetal membranes  
246 and myometrium were elevated in both TL and PTL<sup>[29]</sup>. Consistently, the expression  
247 of the ER stress response in the uterine smooth muscle was increased during labor  
248 when compared to non-labor tissues. Here, we found that, although there was no  
249 obvious change in GRP78, knock down of IL-33 increased the expression of IRE1 $\alpha$   
250 and XBP1s significantly. As a chaperone protein in the ER, GRP78 binds to three  
251 prominent ER stress proteins under steady state conditions. These are PERK,  
252 ATF6 related to redox reaction and the Golgi apparatus, respectively. An additional  
253 protein, IRE1 $\alpha$ , is also involved and it is related to inflammatory signals and repairing  
254 protein mis-folding<sup>[30, 31]</sup>. During the adaptive phase of the ER stress response, the  
255 IRE1 $\alpha$ -XBP1s pathway is activated.

256 To explore the potential mechanism of how IL-33 is involved in the process of  
257 labor, we transfected siRNA IL-33 into primary myometrial cells, and the decrease in  
258 nuclear IL-33 prompted the increase of COX-2 expression after LPS stimulation.  
259 However, after IL-33 was knocked out, the stimulating effect of LPS on COX-2  
260 which could be blocked by calcium chelating agents was more obvious. Furthermore,  
261 we explored whether the modest ER stress response seen relates to the process of  
262 labor. We found that the expression of COX-2 was sharply decreased by loading the  
263 primary cells with an ER stress response blocker which is similar with research results

264 seen with modulation of pain by leukocytes<sup>[32]</sup>.

265       Based on the above findings, we speculated that IL-33 could influence COX-2  
266 expression via two pathways: 1) it directly prevented excessive COX-2 expression in  
267 myometrial cells after LPS stimulation and 2) it influenced COX-2 expression by  
268 maintaining the severity of ER stress response. The binding of IL-33 to NF- $\kappa$ B in the  
269 nucleus could block NF- $\kappa$ B signaling and inhibit the transduction of downstream  
270 associated inflammatory signals<sup>[33]</sup>. Consistent with previous studies<sup>[34]</sup>,  
271 phosphorylation of NF- $\kappa$ B by LPS treatment was increased after IL-33 knockdown in  
272 myometrial cells. Also, we found that a change of the p38/MAPK signaling pathway  
273 was consistent with that of the NF- $\kappa$ B signaling pathway. In addition, selective  
274 blocking of NF- $\kappa$ B and p38/MAPK signaling pathways significantly inhibited the  
275 expression of COX-2. Therefore, we hypothesized that NF- $\kappa$ B and p38/MAPK  
276 signaling pathways may be the potential downstream pathways of IL-33 affecting  
277 LPS-induced COX-2 production (Figure 9).

278

279       To summarize, we found that the nuclear factor, IL-33, can affect contraction of  
280 uterine muscle cells so as to participate in parturition by regulating intracellular  
281 calcium ion and thus influencing the ER stress. Our study demonstrates that nuclear  
282 IL-33 in the myometrium participates in maintaining a uterine quiescent state at the  
283 tissue-to-cellular level during late pregnancy. Further studies on whether IL-33 is  
284 involved in the redox reaction of mitochondria as well as regulation of intracellular  
285 calcium ions caused by ER stress are necessary.

## 286 **Materials and Methods**

### 287 **Ethics**

288 The subjects of the study were cesarean section patients in the Obstetrics  
289 Department of the First Affiliated Hospital of Nanjing Medical University. These  
290 included only cesarean section patients without obstetric complications, such as  
291 breeched pregnancies, mothers with scarred uteruses and giant babies. All patients  
292 signed an informed consent form. The study was approved by the Ethics Committee  
293 of the First Affiliated Hospital of Nanjing Medical University, China, and complies  
294 with the Declaration of Principles of Helsinki.

### 295 **Specimen collection**

296 Patients were separated into 4 groups: term labor (TL), preterm labor (PTL), term  
297 non-labor (TNL) and preterm non-labor (PNL) groups. When undergoing cesarean  
298 section, a sample of the uterine smooth muscle ( $1.0 \times 1.0 \times 1.0 \text{cm}^3$ ) was cut from the  
299 site of incision at the lower and upper edge of the uterus. The muscle was washed 3  
300 times in pre-cooled PBS to remove excess blood, quickly frozen in liquid nitrogen,  
301 and stored at  $-80^\circ\text{C}$ . In some cases, similar sized samples were stored in cold PBS and  
302 used for culture of myometrial smooth muscle cells.

### 303 **Western blotting**

304 Proteins were extracted from human primary myometrium cells and human  
305 uterine smooth muscle tissues. Proteins were separated by using 8% or 10% sodium  
306 dodecyl sulfate polyacrylamide gel electrophoresis and transferred to polyvinylidene  
307 fluoride membranes (IPVH00010, Mreck Millipore). Nonspecific binding sites were

308 blocked by incubation with 5% non-fat milk for 2 hours. Membranes were then  
309 incubated with specific antibodies overnight at 4°C and washed 3 times with  
310 phosphate-buffered saline with Tween-20 (PBST) and then incubated with infrared  
311 dye-labeled secondary antibodies for 2 hours at room temperature.

312 After further washes with PBST, membranes were visualized using a Bio-Rad gel  
313 imager and the results were normalized to  $\beta$ -actin or GAPDH protein and expressed in  
314 arbitrary units. The antibodies used were: anti-IL-33 antibody (1:1000, ab54385,  
315 Abcam); anti-p-IRE1 $\alpha$  antibody (1:1000, ab124945, Abcam) ; anti-XBP1s antibody  
316 (1:1000, 83418, Cell Signaling Technology); anti-GRP78 antibody (1:1000,  
317 11587-1-AP, Proteintech); anti-COX-2 antibody (1:1000, ab179800, Abcam); anti-p38  
318 antibody (1:1000, D13E1, 8690, Cell Signaling Technology); anti-NF- $\kappa$ B antibody  
319 (1:1000, D14E12, 8242, Cell Signaling Technology); anti-phospho-p38 antibody  
320 (1:1000, D3F9, 4511, Cell Signaling Technology); anti-phospho-NF- $\kappa$ B antibody  
321 (1:1000, 93H1, 3033, Cell Signaling Technology); anti-Cav 3.1 antibody (1:2000,  
322 DF10014, Affinity) and anti-Cav 3.2 antibody (1:500, sc-377510, Santa Cruz  
323 Biotechnology).

#### 324 **Immunohistochemistry**

325 The fixed paraffin-embedded sections of human myometrium were rehydrated in  
326 a graded series of decreasing alcohol concentrations. Sections were incubated in 3%  
327 hydrogen peroxide for 30 minutes to block endogenous peroxidase and 2% normal  
328 goat serum for 1 hour to reduce nonspecific binding. Then samples were incubated  
329 overnight at 4°C with goat anti-human IL-33 monoclonal antibody (MAB36253, R&D)



330 at a concentration of 0.1 µg/mL and then 1-3 drops of biotinylated secondary  
331 antibodies for 2 hours at room temperature. 1-5 drops of DAB chromogen solution  
332 were added to cover the entire tissue section and incubated for 10 minutes. The  
333 sections were rinsed in deionized H<sub>2</sub>O and the slides were drained and the stained  
334 tissue was covered with a coverslip of an appropriate size. These were then visualized  
335 under a microscope using a bright-field illumination.

### 336 **Real-time quantitative PCR (qPCR)**

337 Total RNA was isolated using Trizol reagent (SN114, NanJing SunShine  
338 Biotechnology). The RNA was reverse transcribed to cDNA using a cDNA first strand  
339 synthesis kit (D6110A, Takara Bio), according to the manufacturer's instructions. The  
340 upstream and downstream primer sequences used are shown in Supplemental Table 1.  
341 Quantitative, real-time PCR was then conducted with SsfastTMEvaGreen Supermix  
342 (172-5201AP, BIO-RAD) in a BioRad CFX96 Touch Real-Time PCR. The relative  
343 abundance of mRNA in myometrium was normalized to that of β-actin using the  
344 comparative cycle threshold method ( $2^{-\Delta\Delta CT}$ ).

### 345 **Immunofluorescence**

346 Tissue sections and cells were fixed with 4% paraformaldehyde in PBS for 30  
347 minutes at room temperature, washed three times with PBS and repaired with 75%  
348 glycine for 10 minutes. Then they permeabilized with 0.5% Triton X-100 in PBS for  
349 30 minutes, and then washed three times with PBS and blocked with 3% bovine  
350 serum albumin (BSA, sh30087.02, HyClone) in PBS for 1 hour. These operations  
351 were conducted at room temperature. Primary antibody incubation was performed

352 overnight at 4°C with goat monoclonal anti-IL-33 (1:200, MAB36253, R&D) diluted  
353 in 0.2% BSA in PBS. For detection, the tissues were incubated for 2 hours at room  
354 temperature with Alexa Flour 594 secondary antibody (1:500, A32758, Life  
355 Technologies) which was diluted in 0.2% BSA in PBS. The samples were washed as  
356 described above, mounted using Antifade Mounting Medium with DAPI (P0131,  
357 Beyotime Biotechnology) and analyzed using a confocal fluorescence microscope  
358 (LSM 800, Zeiss).

### 359 **Human myometrium cell culture**

360 The full-thickness uterus was obtained from women undergoing a scheduled term  
361 ( $\geq 37$  weeks of gestation) cesarean section delivery. Patients who lacked signs of  
362 infection or known pregnancy complications and were clinically defined as not in  
363 labor on the basis of intact membranes, a closed cervix and a quiescent uterus. After  
364 delivery of the placenta, samples of myometrium ( $1\text{cm}^3$ ) were excised from the upper  
365 incisional margin of the lower uterine segment and immediately washed in ice-cold  
366 PBS. Myometrium was carefully minced into small pieces of about  $1\text{ mm}^3$ ,  
367 subsequently washed and incubated with gentle agitation for 40 min, at 37 °C, with  
368 collagenase IA (C9891, Sigma-Aldrich) and collagenase XI (C7657, Sigma-Aldrich)  
369 each at 0.5 mg/mL in DMEM/F-12 media (A4192001, Gibco) supplemented with  
370 BSA (sh30087.02, HyClone) at 1 mg/mL. The dispersed cells were separated from  
371 non-digested tissue by filtration through a cell strainer ( $70\text{ }\mu\text{m}$ , 431751, Corning) and  
372 collected by centrifugation of the filtrate at 3000 rpm for 5 minutes at room  
373 temperature. The cells were suspended in DMEM/F-12 media supplemented with

374 10% FBS (10270-106, Gibco) and 1% penicillin/streptomycin/amphotericin B  
375 (15240062, Gibco). Cells were then dispersed in 12.5cm<sup>2</sup> plastic culture flasks (12631,  
376 JETBIOFIL) or on glass coverslips into 12-well plates (7516, JETBIOFIL). Culture  
377 medium was changed every 48 hours. Cells were maintained at 37 °C in a humidified  
378 atmosphere (5 % CO<sub>2</sub> in air) until they were semi-confluent (usually 9 days after  
379 plating) when the cells were detached using 0.25 % trypsin-EDTA (15050065, Gibco).  
380 Experiments were performed using cells between passages 1 and 4. Culture media  
381 were collected after incubations and protein concentration of multiple secreted  
382 cytokines was analyzed by ELISA.

### 383 **Cell interference**

384 To elucidate the involvement of IL-33 in the regulation of uterine contractions  
385 during delivery, knockdown experiments were performed in myometrium cells. After  
386 starving the cells for 2 hours in serum-free medium, a Lipofectamine 2000 (11668027,  
387 Thermo Fisher Scientific) and siRNA IL-33 (Gene Pharma) mixture was added  
388 according to the manufacturer's instructions. After incubation in the incubator for 6  
389 hours, the medium was replaced for a further 48 hours and the efficiency of siRNA  
390 transfection was measured by western blotting analysis.

### 391 **Medicine loading**

392 Some cells were incubated with lipopolysaccharides (LPS L8880, Solarbio). 10  
393 µg/mL of LPS was added to treat the cells for 5, 10, 15 and 30 minutes as well as 1, 3,  
394 6, 9, 12, 18 and 24h respectively whereas the untreated uterine smooth muscle cells  
395 were used as a control group.

396 4 $\mu$ 8C (80 $\mu$ M, HY-19707, Master of Small Molecules) was used to blocked ER  
397 stress and BAPTA-AM (25 $\mu$ g of MAB120503, Abcam), a membrane-permeable  
398 calcium ion chelator was used to block the action of cytoplasmic calcium in the cells.  
399 These were added to the cells 1 hour before LPS treatment.

#### 400 **Enzyme-linked immunosorbent assays (ELISA)**

401 Sandwich ELISA were used to determine the cytokine concentrations in culture  
402 media following various treatments. ELISA kits for human IL-6 and IL-8 were  
403 purchased from MEIMIAN (MM-0049H1 and MM-1558H1, respectively). Culture  
404 media were diluted 1:5 for IL-6 and IL-8 determinations using diluent solutions  
405 supplied by the manufacturer to ensure the absorbance reading would remain within  
406 the range of the standard curve. Absorbance readings were conducted using  
407  $\mu$ Quant<sup>TM</sup> software (128C-400, BioTek<sup>®</sup> Instruments) according to the  
408 manufacturer's instructions.

#### 409 **Statistical analysis**

410 The data are presented as mean percentages of control  $\pm$  SD. The data from  
411 western blots are presented as means  $\pm$  SEM of the ratios. Statistical analyses were  
412 compared using an unpaired two-tailed Student's t test or a one-way analysis of  
413 variance and Bonferroni multiple comparisons test with SPSS software (version 25.0  
414 for Windows, IBM Inc, Chicago, IL, USA) and the figures were generated using  
415 Graphpad Prism.

416 **Data Availability Statement**

417 All data generated or analyzed during this study are included in the manuscript  
418 and supporting files.

419 **Ethics Statement**

420 This study was approved by the Ethics Committee of the First Affiliated Hospital  
421 of Nanjing Medical University, China, and complies with the Declaration of  
422 Principles of Helsinki.

423 **Acknowledgement**

424 The authors thank Hong Zhou for advice and technical assistance in early of this  
425 work. This study was supported by grants from the National Natural Science  
426 Foundation of China (Nos. 81300507).

427 **Conflict of Interest**

428 The authors declare that the research was conducted in the absence of any  
429 commercial or financial relationships that could be construed as a potential conflict of  
430 interest.

431 **References**

- 432 [1] Authors N J O. *Gynecology. Practice Bulletin No. 159: Management of Preterm Labor*. 2016;  
433 127: e29.
- 434 [2] Romero R, S K Dey, S J J S Fisher. *Preterm labor: One syndrome, many causes*. 2014; 345: 760.
- 435 [3] Goldenberg R L, J F Culhane, J D Iams, R J L Romero. *Epidemiology and causes of preterm*  
436 *birth*. 2008; 371: 75-84.
- 437 [4] Lamont R F J F i l. *Advances in the Prevention of Infection-Related Preterm Birth*. 2015; 6.
- 438 [5] Cayrol C, J P J I R Girard. *Interleukin-33 (IL-33): A nuclear cytokine from the IL-1 family*. 2018;  
439 281: 154-168.
- 440 [6] Drake L Y, H J I R Kita. *IL-33: biological properties, functions, and roles in airway disease*. 2017;  
441 278: 173-184.
- 442 [7] Huang B, A N Faucette, M Pawlitz, B Pei, J W Goyert, J Z Zhou, N G El-Hage, J De Ng, J Lin, F J N  
443 M Yao. *Interleukin-33-induced expression of PIBF1 by decidual B cells protects against*  
444 *preterm labor*. 2016; 23: 128.
- 445 [8] Bonnelykke K, P Sleiman, K Nielsen, E Kreiner-Moller, J M Mercader, D Belgrave, H T den  
446 Dekker, A Husby, A Sevelsted, G Faura-Tellez, L J Mortensen, L Paternoster, R Flaaten, A  
447 Molgaard, D E Smart, P F Thomsen, M A Rasmussen, S Bonas-Guarch, C Holst, E A Nohr, R  
448 Yadav, M E March, T Blicher, P M Lackie, V W Jaddoe, A Simpson, J W Holloway, L Duijts, A  
449 Custovic, D E Davies, D Torrents, R Gupta, M V Hollegaard, D M Hougaard, H Hakonarson, H  
450 Bisgaard. *A genome-wide association study identifies CDHR3 as a susceptibility locus for early*  
451 *childhood asthma with severe exacerbations*. *Nat Genet* 2014; 46: 51-5. DOI:  
452 10.1038/ng.2830
- 453 [9] Kaur D, E Gomez, C Doe, R Berair, L Woodman, R Saunders, F Hollins, F R Rose, Y Amrani, R  
454 May, J Kearley, A Humbles, E S Cohen, C E Brightling. *IL-33 drives airway hyper-responsiveness*  
455 *through IL-13-mediated mast cell: airway smooth muscle crosstalk*. *Allergy* 2015; 70: 556-67.  
456 DOI: 10.1111/all.12593
- 457 [10] Yao Y, R Chen, C Ying, G Zhang, T Rui, A Tao. *Interleukin-33 attenuates doxorubicin-induced*  
458 *cardiomyocyte apoptosis through suppression of ASK1/JNK signaling pathway*. *Biochem*  
459 *Biophys Res Commun* 2017; 493: 1288-1295. DOI: 10.1016/j.bbrc.2017.09.153
- 460 [11] Theoharides T C, B Zhang, D Kempuraj, M Tagen, M Vasiadi, A Angelidou, K D Alysandratos, D  
461 Kalogeromitros, S Asadi, N Stavrianeas, E Peterson, S Leeman, P Conti. *IL-33 augments*  
462 *substance P-induced VEGF secretion from human mast cells and is increased in psoriatic skin*.  
463 *Proc Natl Acad Sci U S A* 2010; 107: 4448-53. DOI: 10.1073/pnas.1000803107
- 464 [12] Hantoushzadeh S, R Anvari Aliabad, A H Norooznejhad. *Antibiotics, Inflammation, and*  
465 *Preterm Labor: A Missed Conclusion*. *J Inflamm Res* 2020; 13: 245-254. DOI:  
466 10.2147/JIR.S248382
- 467 [13] Gilman-Sachs A, S Dambaeva, M D Salazar Garcia, Y Hussein, J Kwak-Kim, K Beaman.  
468 *Inflammation induced preterm labor and birth*. *J Reprod Immunol* 2018; 129: 53-58. DOI:  
469 10.1016/j.jri.2018.06.029
- 470 [14] Hadley E E, S Sheller-Miller, G Saade, C Salomon, S Mesiano, R N Taylor, B D Taylor, R Menon.  
471 *Amnion epithelial cell-derived exosomes induce inflammatory changes in uterine cells*. *Am J*  
472 *Obstet Gynecol* 2018; 219: 478 e1-478 e21. DOI: 10.1016/j.ajog.2018.08.021

- 473 [15] Shynlova O, L Nadeem, J Zhang, C Dunk.S Lye. Myometrial activation: Novel concepts  
474 underlying labor. *Placenta* 2020; 92: 28-36. DOI: 10.1016/j.placenta.2020.02.005
- 475 [16] Martin N T.M U Martin. Interleukin 33 is a guardian of barriers and a local alarmin. *Nat*  
476 *Immunol* 2016; 17: 122-31. DOI: 10.1038/ni.3370
- 477 [17] Carriere V, L Roussel, N Ortega, D A Lacorre, L Americh, L Aguilar, G Bouche.J P Girard. IL-33,  
478 the IL-1-like cytokine ligand for ST2 receptor, is a chromatin-associated nuclear factor in vivo.  
479 *Proc Natl Acad Sci U S A* 2007; 104: 282-7. DOI: 10.1073/pnas.0606854104
- 480 [18] Hu W T, L L Huang, M Q Li, L P Jin, D J Li.X Y Zhu. Decidual stromal cell-derived IL-33  
481 contributes to Th2 bias and inhibits decidual NK cell cytotoxicity through NF-kappaB signaling  
482 in human early pregnancy. *J Reprod Immunol* 2015; 109: 52-65. DOI:  
483 10.1016/j.jri.2015.01.004
- 484 [19] Fock V, M Mairhofer, G R Otti, U Hiden, A Spittler, H Zeisler, C Fiala, M Knofler.J Pollheimer.  
485 Macrophage-derived IL-33 is a critical factor for placental growth. *J Immunol* 2013; 191:  
486 3734-43. DOI: 10.4049/jimmunol.1300490
- 487 [20] Sheng Y R, W T Hu, C Y Wei, L L Tang, Y K Liu, Y Y Liu, J P Qiu, D J Li.X Y Zhu. IL-33/ST2 axis  
488 affects the polarization and efferocytosis of decidual macrophages in early pregnancy. *Am J*  
489 *Reprod Immunol* 2018; 79: e12836. DOI: 10.1111/aji.12836
- 490 [21] Hu W T, M Q Li, W Liu, L P Jin, D J Li.X Y Zhu. IL-33 enhances proliferation and invasiveness of  
491 decidual stromal cells by up-regulation of CCL2/CCR2 via NF-kappaB and ERK1/2 signaling. *Mol*  
492 *Hum Reprod* 2014; 20: 358-72. DOI: 10.1093/molehr/gat094
- 493 [22] Chen H, X Zhou, T L Han, P N Baker, H Qi.H Zhang. Decreased IL-33 Production Contributes to  
494 Trophoblast Cell Dysfunction in Pregnancies with Preeclampsia. *Mediators Inflamm* 2018;  
495 2018: 9787239. DOI: 10.1155/2018/9787239
- 496 [23] Spaans F, B N Melgert, C Chiang, T Borghuis, P A Klok, P de Vos, H van Goor, W W Bakker.M M  
497 Faas. Extracellular ATP decreases trophoblast invasion, spiral artery remodeling and immune  
498 cells in the mesometrial triangle in pregnant rats. *Placenta* 2014; 35: 587-95. DOI:  
499 10.1016/j.placenta.2014.05.013
- 500 [24] Pelletier L.M Savignac. Involvement of ion channels in allergy. *Curr Opin Immunol* 2018; 52:  
501 60-67. DOI: 10.1016/j.coi.2018.04.006
- 502 [25] Gupta R K, K Gupta.P D Dwivedi. Pathophysiology of IL-33 and IL-17 in allergic disorders.  
503 *Cytokine Growth Factor Rev* 2017; 38: 22-36. DOI: 10.1016/j.cytogfr.2017.09.005
- 504 [26] Wray S.C Prendergast. The Myometrium: From Excitation to Contractions and Labour. *Adv*  
505 *Exp Med Biol* 2019; 1124: 233-263. DOI: 10.1007/978-981-13-5895-1\_10
- 506 [27] Almanza A, A Carlesso, C Chintha, S Creedican, D Doultosinos, B Leuzzi, A Luis, N McCarthy, L  
507 Montibeller, S More, A Papaioannou, F Puschel, M L Sassano, J Skoko, P Agostinis, J de  
508 Bellerocche, L A Eriksson, S Fulda, A M Gorman, S Healy, A Kozlov, C Munoz-Pinedo, M Rehm, E  
509 Chevet.A Samali. Endoplasmic reticulum stress signalling - from basic mechanisms to clinical  
510 applications. *FEBS J* 2019; 286: 241-278. DOI: 10.1111/febs.14608
- 511 [28] Guzel E, S Arlier, O Guzeloglu-Kayisli, M S Tabak, T Ekiz, N Semerci, K Larsen, F Schatz, C J  
512 Lockwood.U A Kayisli. Endoplasmic Reticulum Stress and Homeostasis in Reproductive  
513 Physiology and Pathology. *Int J Mol Sci* 2017; 18. DOI: 10.3390/ijms18040792
- 514 [29] Liong S.M Lappas. Endoplasmic reticulum stress is increased after spontaneous labor in  
515 human fetal membranes and myometrium where it regulates the expression of prolabor  
516 mediators. *Biol Reprod* 2014; 91: 70. DOI: 10.1095/biolreprod.114.120741

- 517 [30] Ron D.P Walter. Signal integration in the endoplasmic reticulum unfolded protein response.  
518 *Nat Rev Mol Cell Biol* 2007; 8: 519-29. DOI: 10.1038/nrm2199
- 519 [31] Oakes S A.F R Papa. The role of endoplasmic reticulum stress in human pathology. *Annu Rev*  
520 *Pathol* 2015; 10: 173-94. DOI: 10.1146/annurev-pathol-012513-104649
- 521 [32] Chopra S, P Giovanelli, P A Alvarado-Vazquez, S Alonso, M Song, T A Sandoval, C S Chae, C  
522 Tan, M M Fonseca, S Gutierrez, L Jimenez, K Subbaramaiah, T Iwawaki, P J Kingsley, L J  
523 Marnett, A V Kossenkov, M S Crespo, A J Dannenberg, L H Glimcher, E A Romero-Sandoval.J R  
524 Cubillos-Ruiz. IRE1alpha-XBP1 signaling in leukocytes controls prostaglandin biosynthesis and  
525 pain. *Science* 2019; 365. DOI: 10.1126/science.aau6499
- 526 [33] Griesenauer B.S Paczesny. The ST2/IL-33 Axis in Immune Cells during Inflammatory Diseases.  
527 *Front Immunol* 2017; 8: 475. DOI: 10.3389/fimmu.2017.00475
- 528 [34] Ali S, A Mohs, M Thomas, J Klare, R Ross, M L Schmitz.M U Martin. The dual function cytokine  
529 IL-33 interacts with the transcription factor NF-kappaB to dampen NF-kappaB-stimulated  
530 gene transcription. *J Immunol* 2011; 187: 1609-16. DOI: 10.4049/jimmunol.1003080
- 531
- 532



533 **Figure legends**

534 **Figure 1.** Nuclear localization of the IL-33 and reduced with the onset of labor. The  
535 sections fixed paraffin-embedded of human myometrium were immune-stained with  
536 anti-IL-33 antibody. (A) Immunohistochemistry results showed that whether in TNL  
537 or PNL tissue, IL-33 mostly located in the nuclear while reduced sharply and emerged  
538 in the cytoplasm with the initiation of labor as shown in figure TL and PTL.  
539 Quantification of IL-33 expression within the nucleus region showed apparent  
540 differences between labor and non-labor tissue (n=4). (B) The sections of human  
541 myometrium were visualized by an Alexa Flour 594 secondary antibody labeled with  
542 IL-33 (Red), and nuclei were stained with DAPI (Blue). Analysis of nuclei was  
543 performed by confocal microscopy, fluorescence signals of IL-33 and nuclei were  
544 superimposed. Immunofluorescence staining results reflected the same phenomenon.  
545 (C) From Western blots, we also can see that non-labor groups had more nuclear  
546 expression and less cytoplasmic expression of IL-33 compared to labor groups while  
547 the total IL-33 had no obvious differences between groups. QT-PCR discovered no  
548 apparent alteration in the levels of IL-33 mRNA. Each value represents the mean  $\pm$   
549 standard deviation (SD) of three independent experiments. \*\* P < 0.01, \*\*\* P < 0.001,  
550 bar 50  $\mu$ m.

551 **Figure 2.** Dynamic changes of IL-33 position during LPS stimulation. (A)  
552 Localization analysis of confocal laser scanning microscopy images of IL-33 with the  
553 stimulation of 10  $\mu$ g/ml LPS, we could see that IL-33 in the nucleus declined sharply  
554 compared with the control group, especially in 3 hours. However, with the longer time

555 of the LPS treatment, the expression of IL-33 commenced to rise again from 6 hours  
556 and reached the peak at 12 hours. The lower panel is the percentage of cells of which  
557 IL-33 expressed mainly in the nucleus (n=3). (B) After the primary cells were loaded  
558 with LPS for different times, cytoplasmic and nuclear proteins were isolated. In the  
559 cytoplasmic and nucleus fraction IL-33 were quantified by Western blotting, the  
560 experiment was performed as described for Figure 2B. Each experiment was  
561 performed at least three times while shown are representative results (n=3). From the  
562 blots, we known that whether cytoplasmic or nucleus fraction IL-33 levels presented  
563 the same change trend as immunofluorescence. \* P < 0.05, \*\* P < 0.01, bar 50  $\mu$ m.

564 **Figure 3.** IL-33 silencing enhanced LPS-induced expression of calcium channels and  
565 the intracellular calcium concentration. Primary myometrium cells were transfected  
566 with IL-33 or non-targeting (as control) siRNAs and treated with 10  $\mu$ g/ml LPS or  
567 PBS (as control) for 6 hours. (A) Immunofluorescence staining analysis performed  
568 with fluo-3AM (green), nuclei were stained with DAPI (blue) (n=3). (B) Western blot  
569 analysis for expression levels of Cav 3.1 and Cav 3.2 in stably transfected and  
570 non-transfected myometrium cells with treatment as indicated (n=5). \* P < 0.05, \*\* P  
571 < 0.01, bar 50  $\mu$ m.

572 **Figure 4.** BAPTA-AM inhibited expression of COX-2 and ER stress response. (A)  
573 Study of COX-2 protein expression with LPS treatment in the absence or presence of  
574 BAPTA-AM (25 $\mu$ g/ml) (n=5). (B) The protein expression of p-IRE1 $\alpha$ , XBP1s and  
575 GRP78 were analyzed by Western blot at 6 hours and 12 hours under LPS stimulate  
576 and with or without BAPTA-AM (n=5). \* P < 0.05, \*\* P < 0.01.

577 **Figure 5.** IL-33 silencing highlighted LPS-induced endoplasmic reticulum stress  
578 response. Based on the discovery that calcium ions affected endoplasmic reticulum  
579 stress, Western blot and QT-PCR were we further to explore the expression of  
580 endoplasmic reticulum stress in tissues from protein and mRNA level. (A) The protein  
581 levels of P-IRE1 $\alpha$  and XBP1s in the TL and PTL groups were higher than those in the  
582 TNL and PNL groups while there was no alteration in the level of GRP78  
583 protein(n=6). (B) The mRNA level of XBP1s in the PTL groups was higher than that  
584 in the PNL groups (n=6). Furthermore, in order to illustrate the protein level changes  
585 of endoplasmic reticulum stress during labor, LPS was used to stimulate primary  
586 uterine smooth muscle cells for different time course and then Western blot was used  
587 to detect the alteration of endoplasmic reticulum stress. (C) It was found that the  
588 protein level of pIRE1 $\alpha$  reached its peak at 10 minutes while XBP1s at 15 minutes,  
589 while the protein level of GRP78 did not change significantly (n=5). We also detected  
590 apparent alteration in endoplasmic reticulum stress protein during cells stimulated  
591 based knockdown experiments targeting IL-33. (D) It revealed that the endoplasmic  
592 reticulum stress response in the siRNA-based group was more obvious compared with  
593 the LPS stimulated directly especially at 30 minutes (n=5). \* P < 0.05, \*\* P < 0.01,  
594 \*\*\* P < 0.005, \*\*\*\*P < 0.001

595 **Figure 6.** IL-33 siRNA and ER stress response affected COX-2 expression in  
596 myometrium cells. (A) In the process of studying whether IL-33 affects COX-2, we  
597 found that the COX-2 expression in the siRNA-mediated group was significantly  
598 increased compared with the LPS alone group (n=5). (B) Western blot analyses

599 showing protein expression of COX-2 in myometrium cells was decreased following  
600 treatment with LPS for 12 hours (n=5). \* P < 0.05, \*\* P < 0.01. Each value represents  
601 the mean ± standard deviation (SD) of three independent experiments.

602 **Figure 7.** IL-33 knockdown enhanced LPS-induced NF-κB and p38/MAPK signaling  
603 pathways. (A) Relative levels of p-P38, P38, p-NF-κB and NF-κB were assessed by  
604 western blot analysis at the indicated time point after LPS (10 μg/ml) stimulation.  
605 Phosphorylation levels of P38 and NF-κB increased gradually with LPS stimulation  
606 and peaked at 15 minutes and 1 hour, respectively(n=5). (B) Western blot analysis of  
607 p-P38, P38, p-NF-κB and NF-κB expression in cells transfected with siRNA targeting  
608 IL-33 after treatment with LPS for 30minutes. Compared with the LPS group, the  
609 protein expression of phosphorylated P38 and NF-κB were increased in the LPS +  
610 siRNA IL-33 group(n=5). (C) The protein level of COX-2 was decreased when  
611 SB-202190 and JSH-23 blocked p38/MAPK and NF-KB signaling pathway,  
612 respectively(n=5). \* P < 0.05, \*\* P < 0.01, \*\*\* P < 0.001.

613 **Figure 8.** IL-33 siRNA and cytoplasmic calcium influence the expression of IL-8 and  
614 IL-6. Compared with the LPS group, the expression of IL-8 and IL-6 was increased in  
615 the LPS+IL-33 siRNA group and decreased in the LPS+BAPTA-AM group (n=5). \* P  
616 < 0.05.

617 **Figure 9.** Model for the role of IL-33 in the myometrium participates in maintaining a  
618 uterine quiescent state at the tissue-to-cellular level during late pregnancy.

619 **Table 1** (The following primers are human)

---

| Target genes | forward primer | reverse primer |
|--------------|----------------|----------------|
|--------------|----------------|----------------|

---

|                |                         |                          |
|----------------|-------------------------|--------------------------|
| IL-33          | TGCCAACAACAAGGAACACTCTG | CACTCCAGGATCAGTCTTGCATTC |
| XBP1s          | CTGAGTCCGCAGCAGGTG      | GTCCAGAATGCCCAACAGGA     |
| GRP78          | CCCGTCCAGAAAGTGTTG      | CAGCACCATACGCTACAG       |
| $\beta$ -actin | CTCCATCCTGGCCTCGCTGT    | GCTGTCACCTTCACCGTCC      |

620

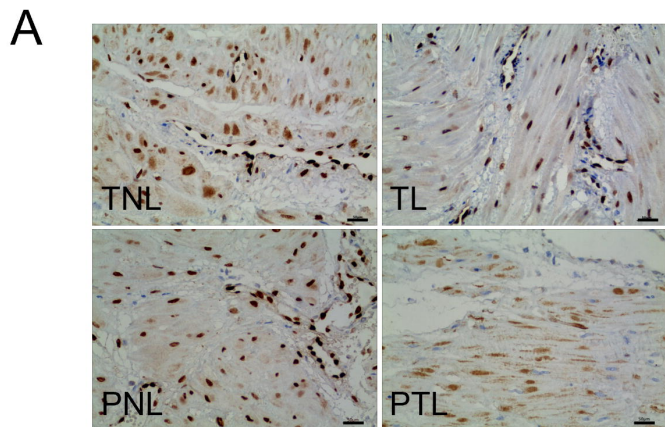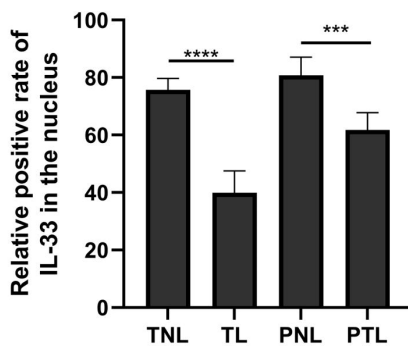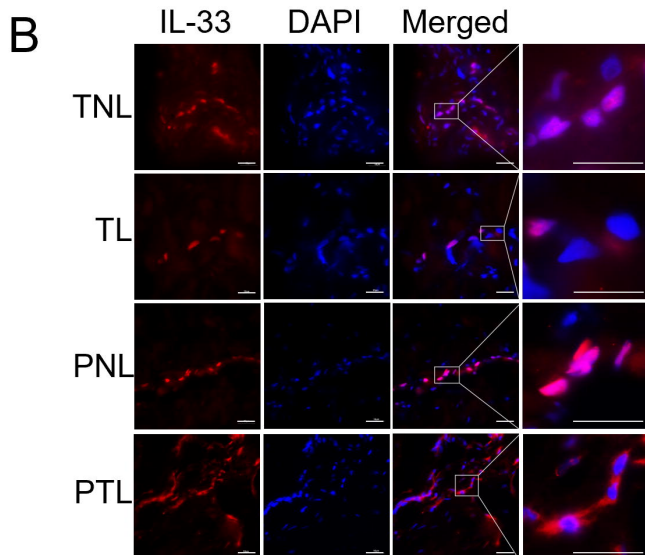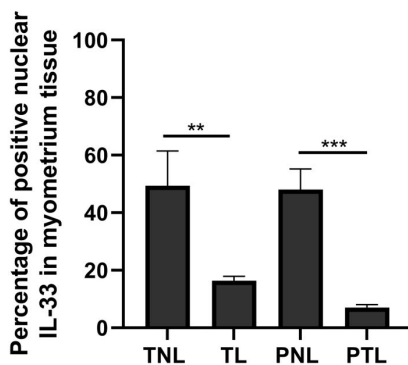

**C**

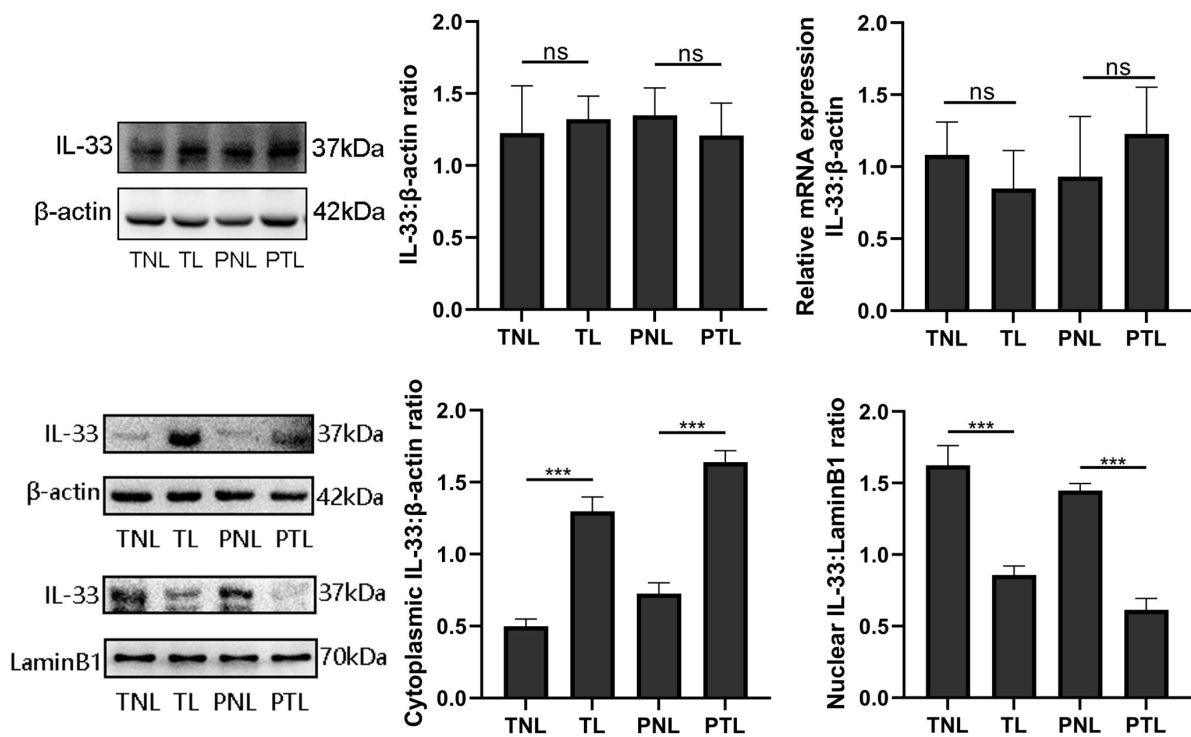

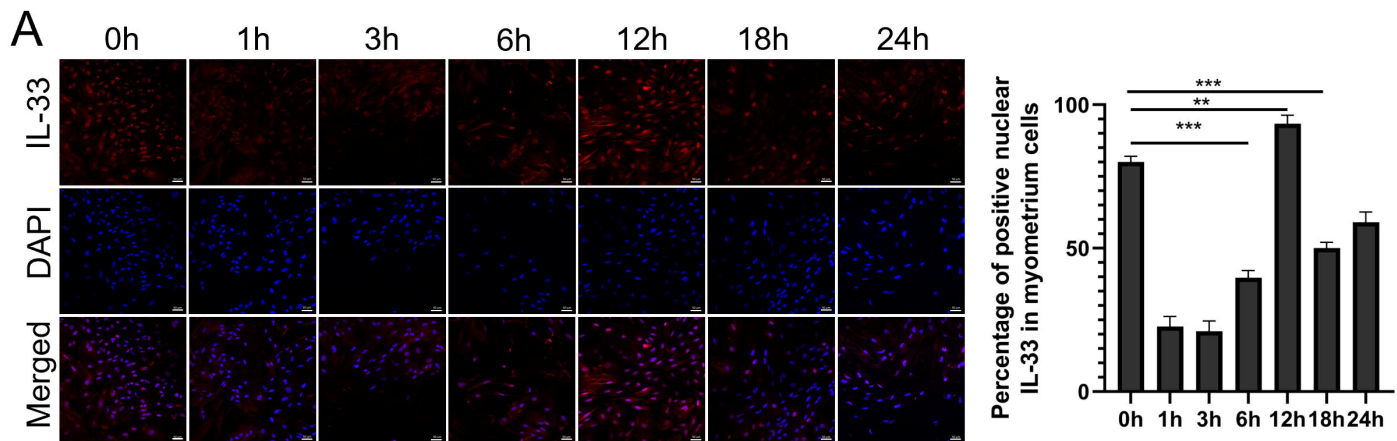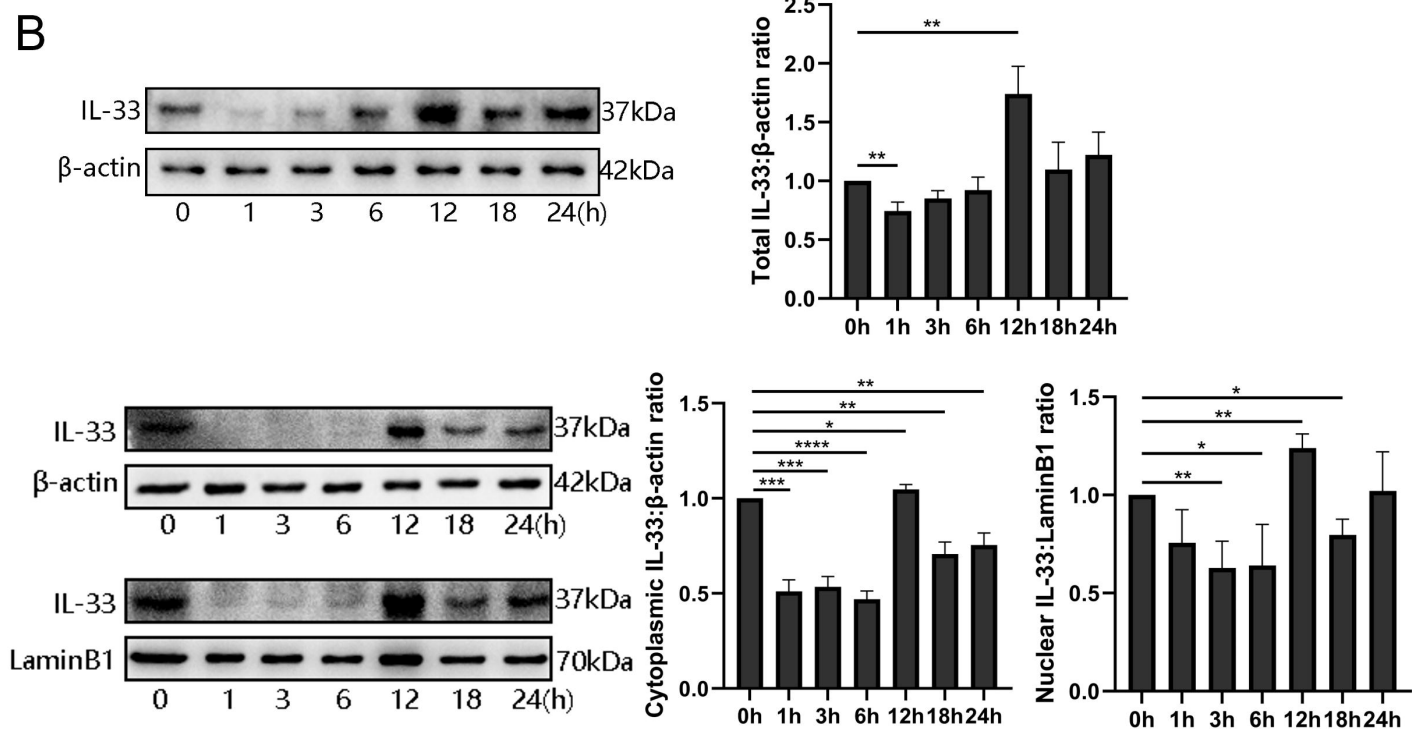

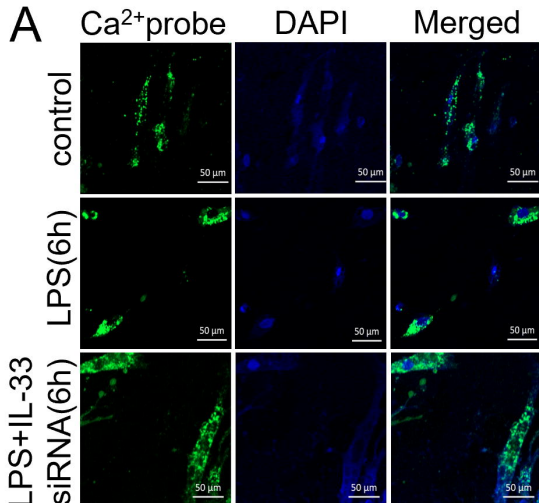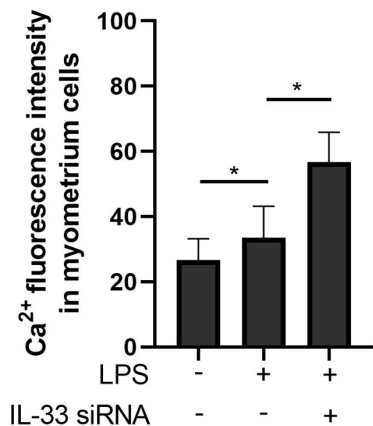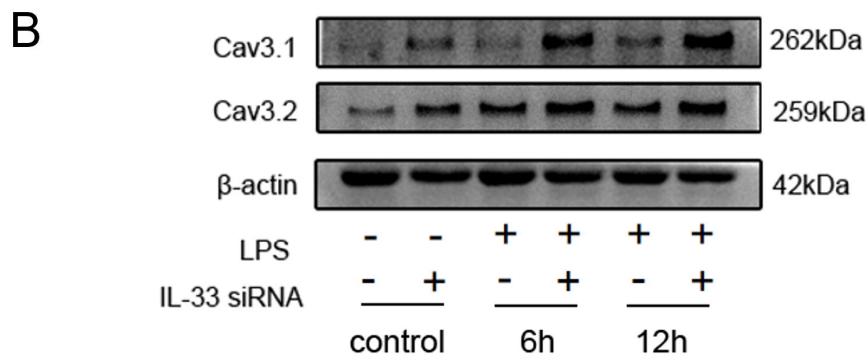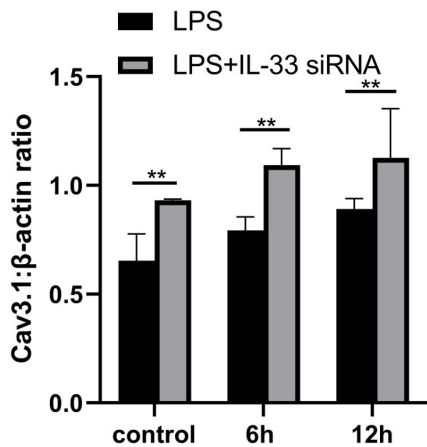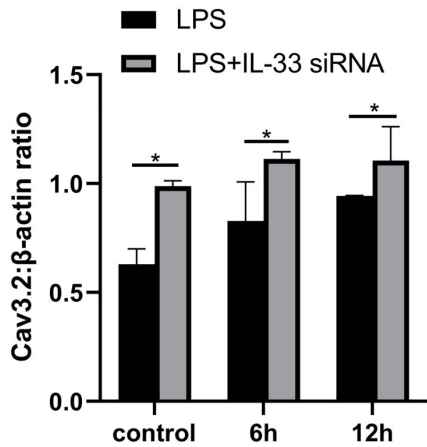



A

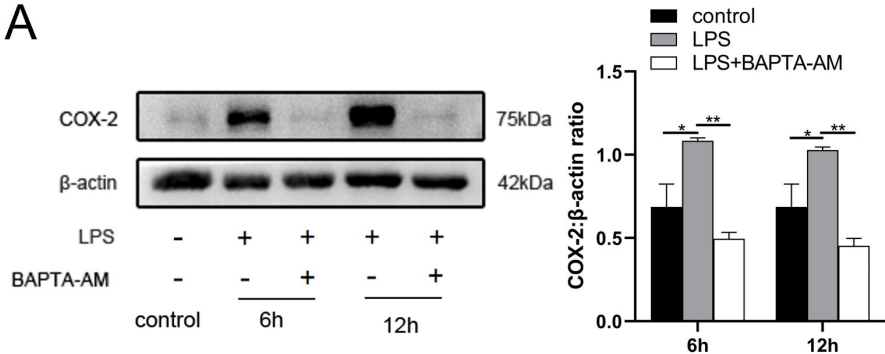

B

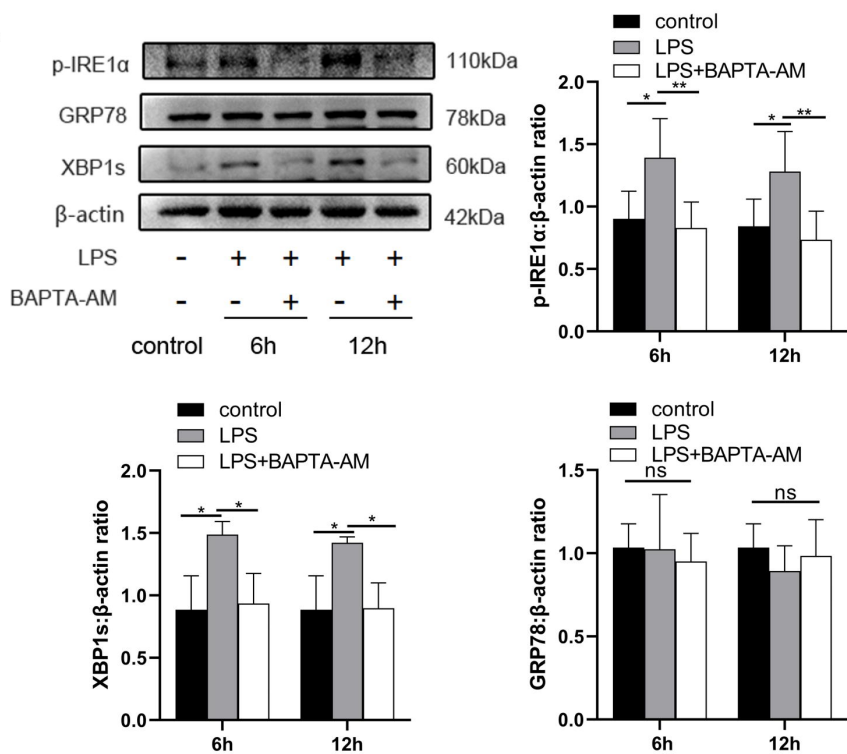

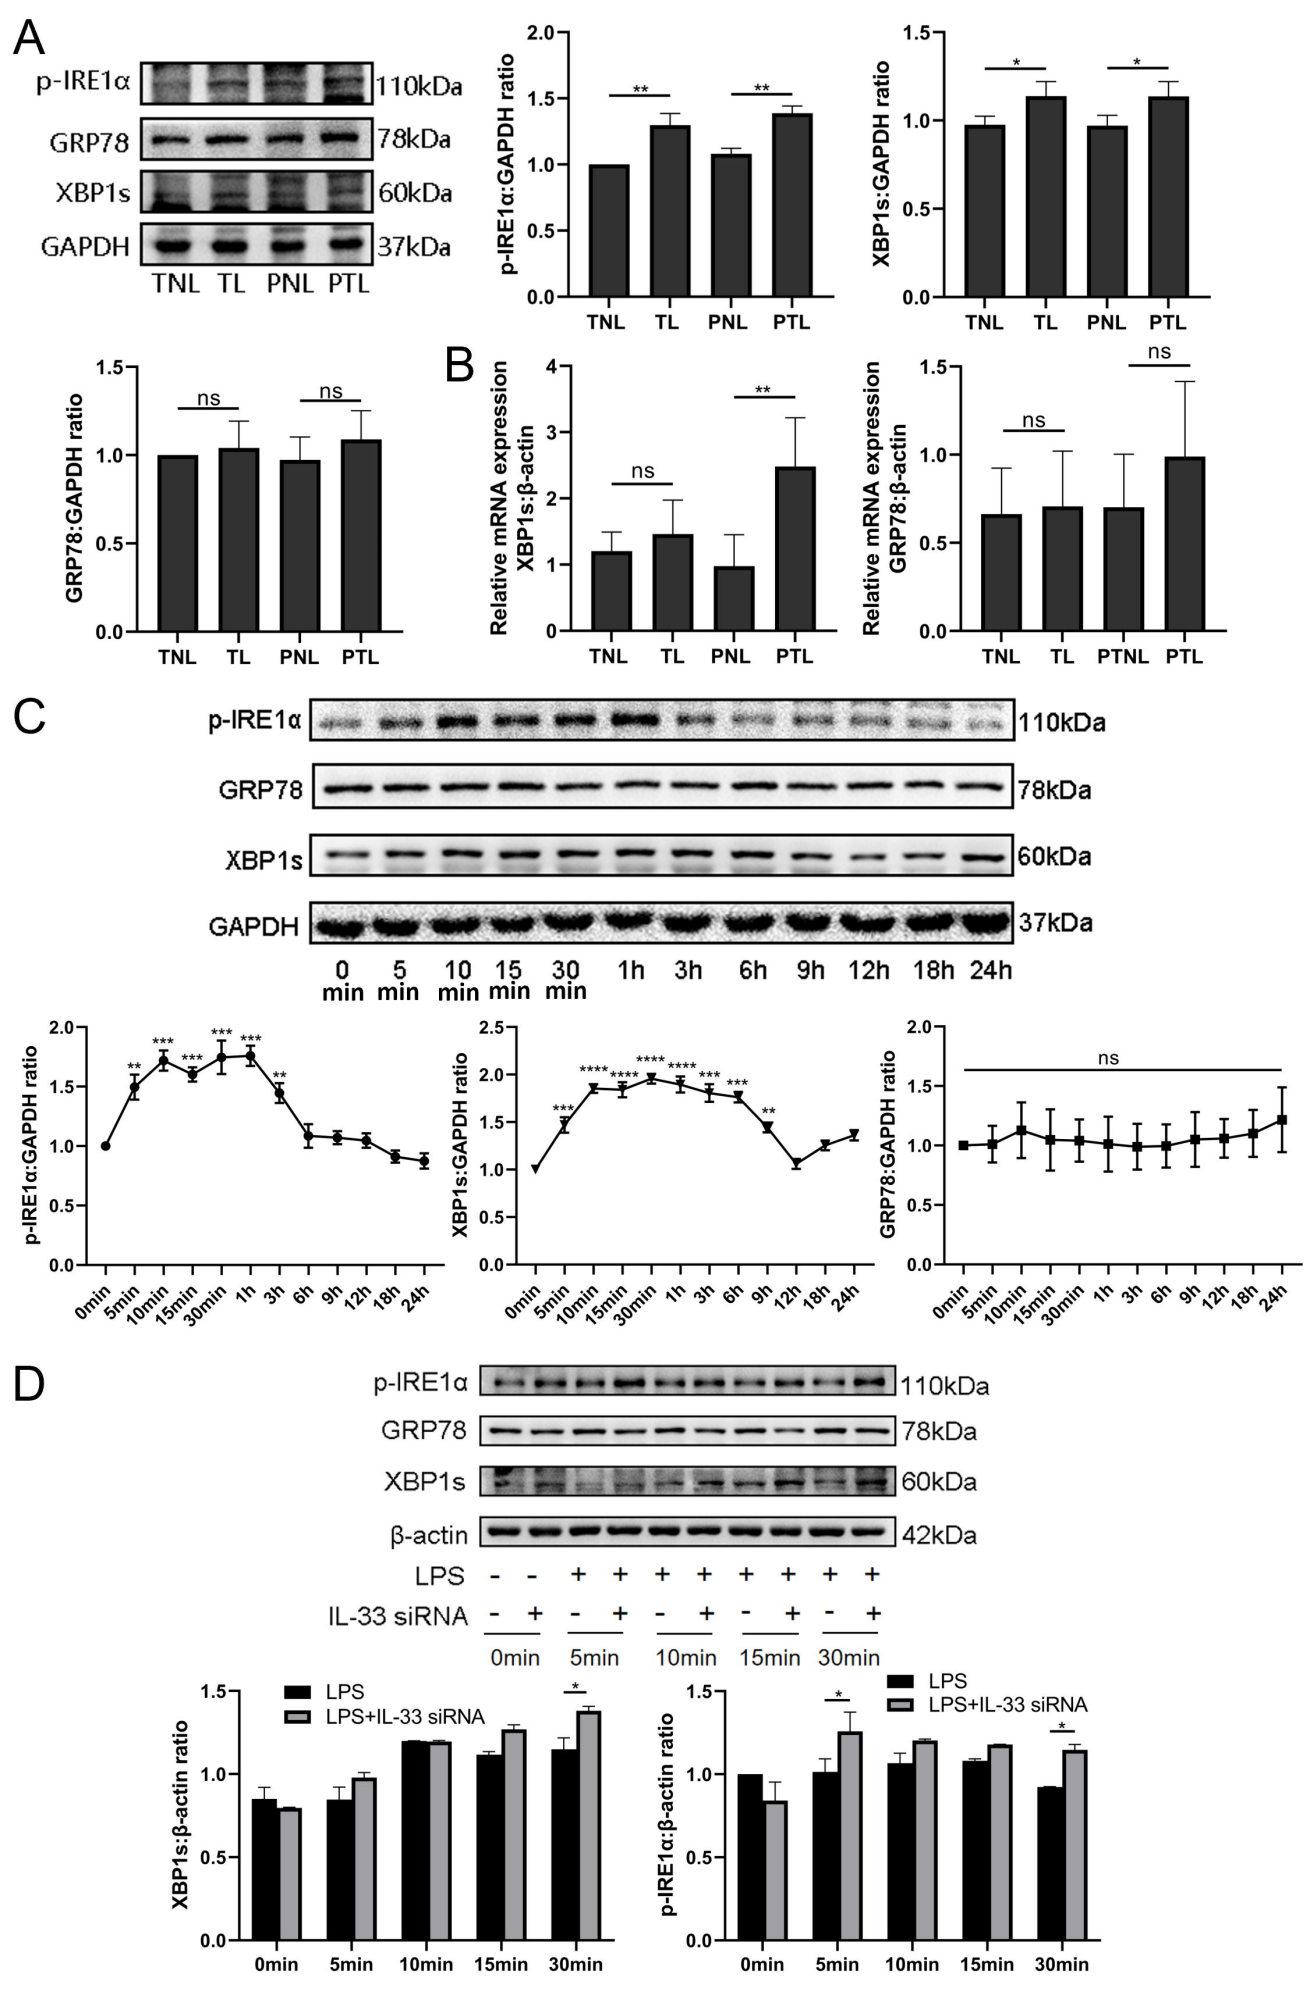

A

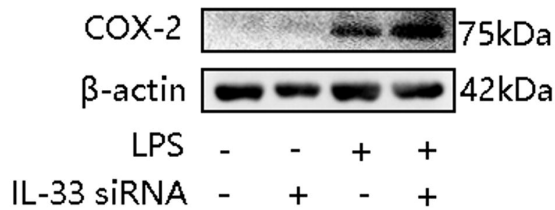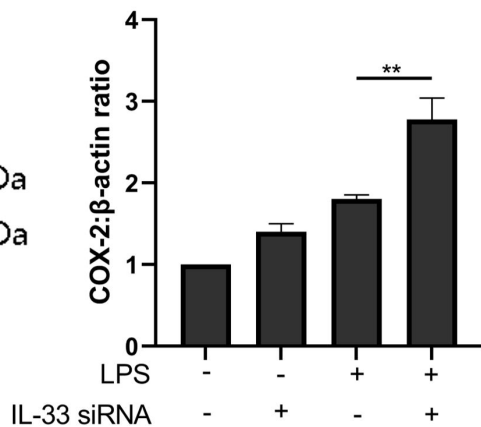

B

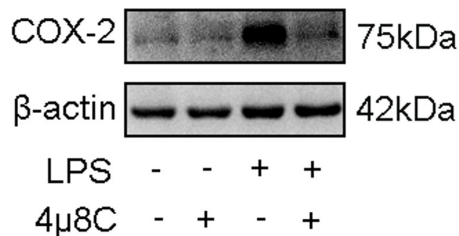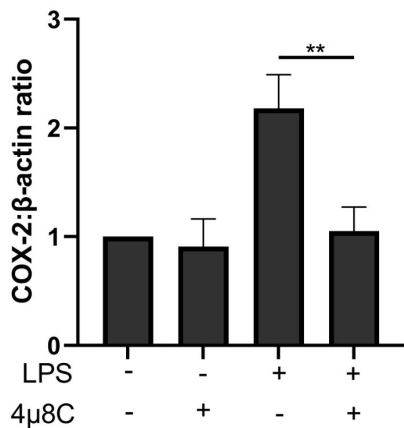

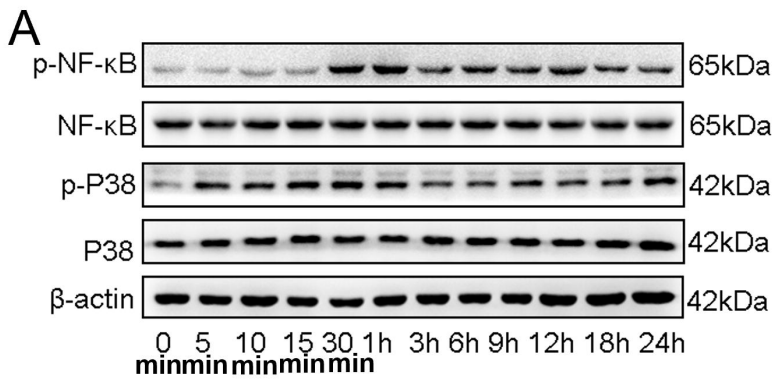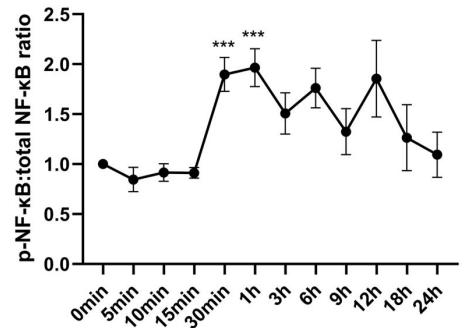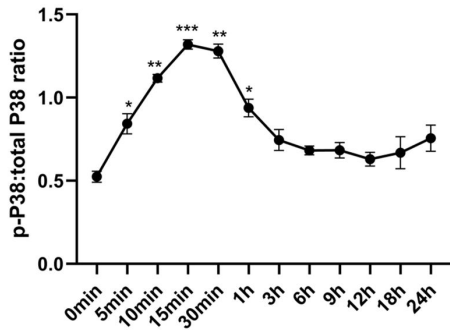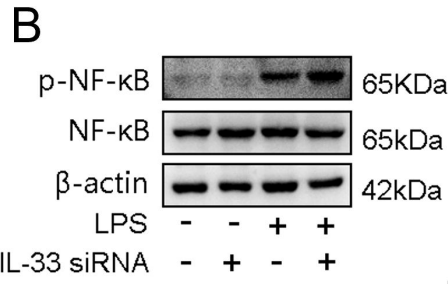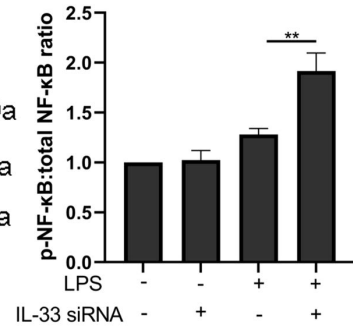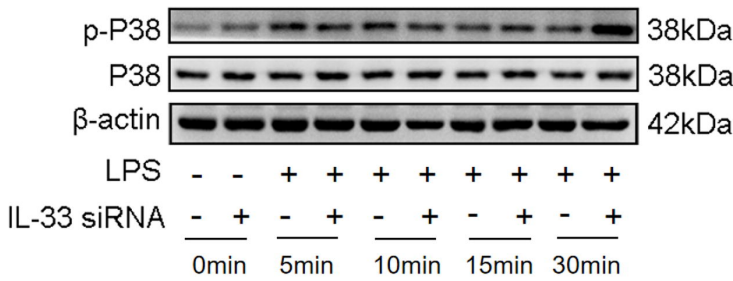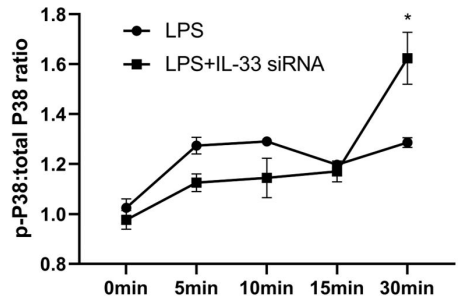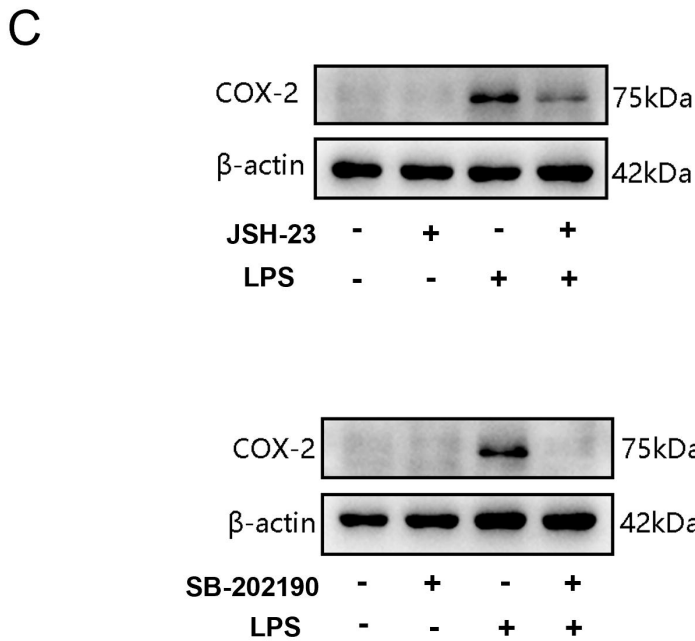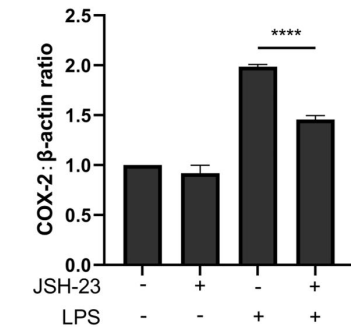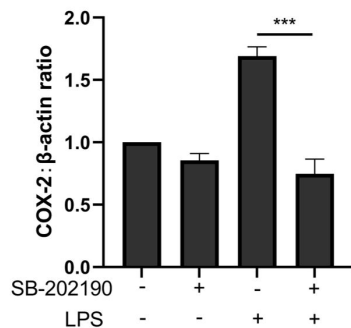

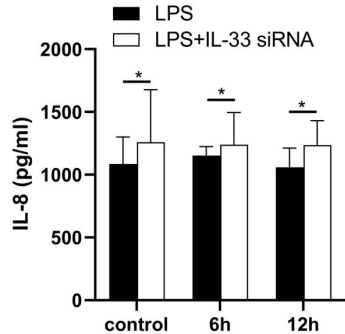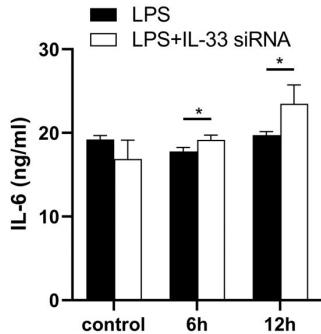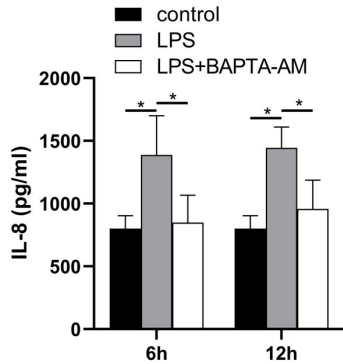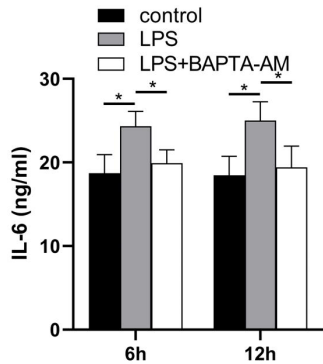

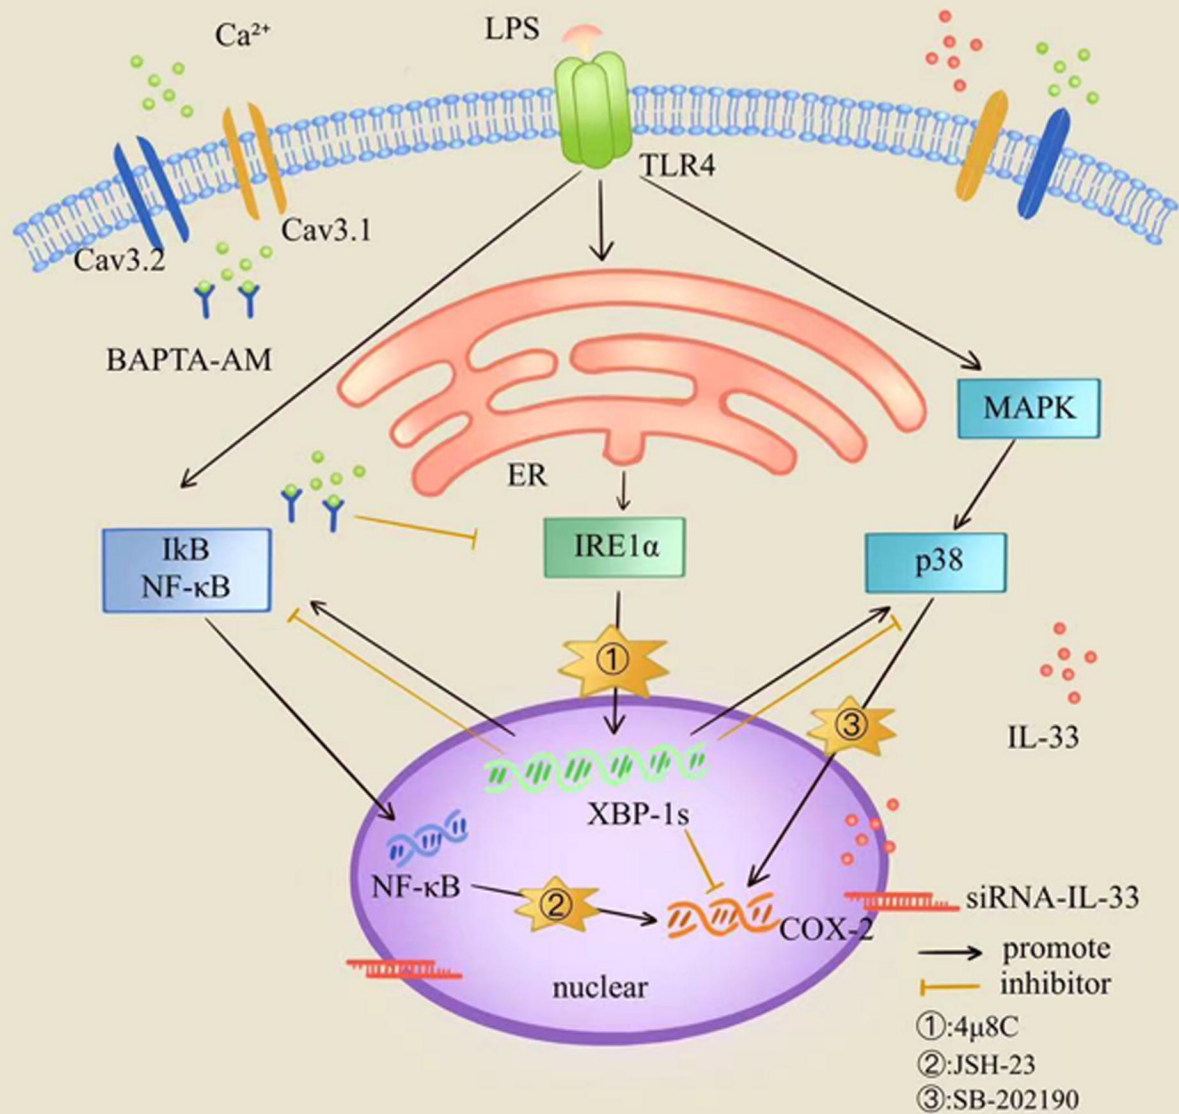

Source: https://medrxiv.org/content/medrxiv/early/2021/11/09/2021.11.05.21265965.full.pdf
